# Supplementary material for: Effect of Age of Agave tequilana Weber Blue Variety on Quality and Authenticity Parameters for the Tequila 100% Agave Silver Class: Evaluation at the Industrial Scale Level
Source: MDPI journal article supplement (doi:10.3390/foods10123103), 2021-12-14
Supplement: s1 [file s1]

# Effect of Agave *tequilana* Weber blue variety age on quality and authenticity parameters of the Tequila 100% agave silver class: evaluation at the industrial scale level.

Efraín Acosta-Salazar <sup>1</sup>, Rocío Fonseca-Aguiñaga <sup>2,3</sup>, Walter M. Warren-Vega <sup>2</sup>, Ana I. Zárate-Guzmán <sup>2,4</sup>, Marco A. Zárate-Navarro <sup>1</sup>, Luis A. Romero-Cano <sup>2,\*</sup>, Armando Campos-Rodríguez <sup>1,\*</sup>

<sup>1</sup> Departamento de Ciencias Biotecnológicas y Ambientales. Universidad Autónoma de Guadalajara. Av. Patria 1201, C.P. 45129. Zapopan, Jalisco. México.

<sup>2</sup> Grupo de Investigación en Materiales y Fenómenos de Superficie. Departamento de Ciencias Biotecnológicas y Ambientales. Universidad Autónoma de Guadalajara. Av. Patria 1201, C.P. 45129. Zapopan, Jalisco. México

<sup>3</sup> Laboratorio de Isotopía, Consejo Regulador del Tequila A. C. Av. Patria 723, Zapopan, Jalisco C.P. 45030, México

<sup>4</sup> Centro de Investigación y Estudios de Posgrado, Facultad de Ciencias Químicas, Universidad Autónoma de San Luis Potosí, San Luis Potosí 78060, México

\* Correspondence: armando.crodriguez@edu.uag.mx (A.C.-R.);  
luis.romero@edu.uag.mx (L.A.R.-C.)

## Supplementary Materials

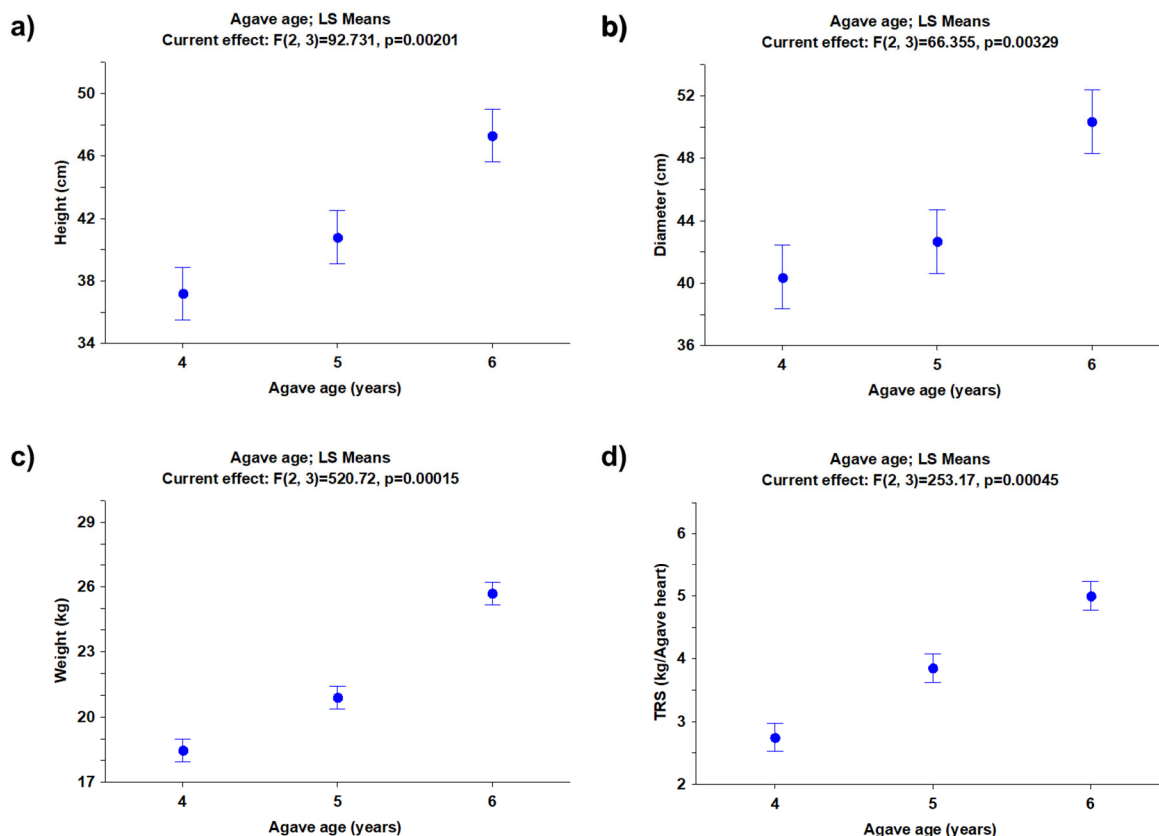

**Figure S1.** Statistical analysis of the physicochemical characterization of the agave hearts from different ages: (a) Height (cm), (b) Diameter (cm), (c) Weight (kg), (d) TRS (kg/Agave heart).

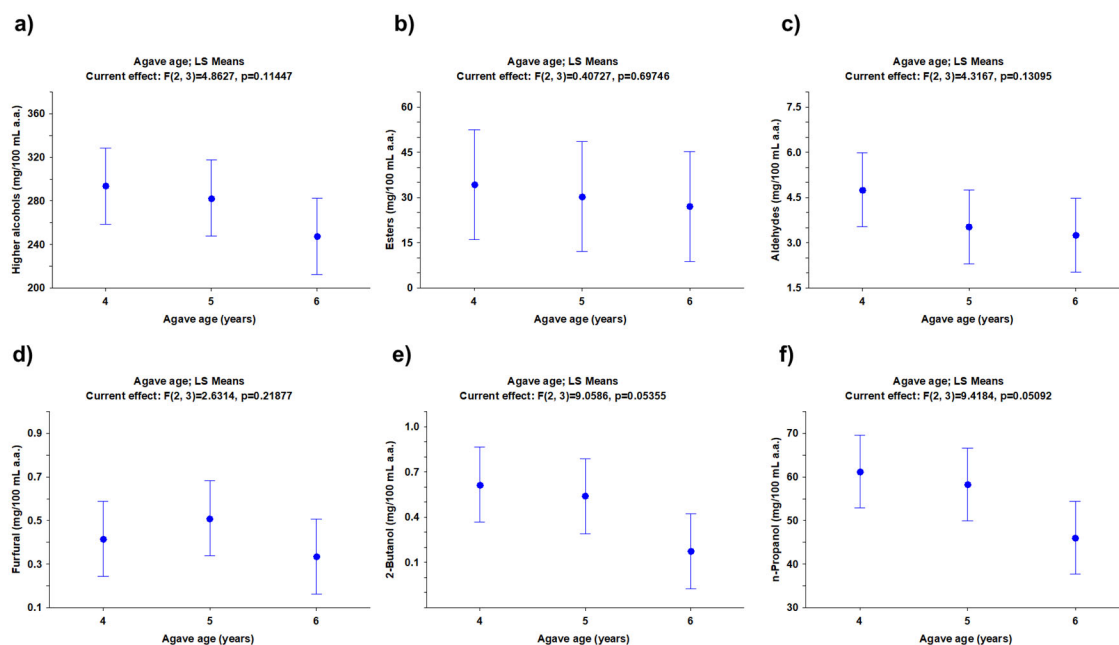

**Figure S2.** Statistical analysis of the congeners in the final product (tequila 100% agave silver class): (a) Higher alcohols (mg/100 mL a.a.), (b) Esters (mg/100 mL a.a.), (c) Aldehydes (mg/100 mL a.a.), (d) Furfural (mg/100 mL a.a.), (e) 2-Butanol (mg/100 mL a.a.), n-Propanol (mg/100 mL a.a.).

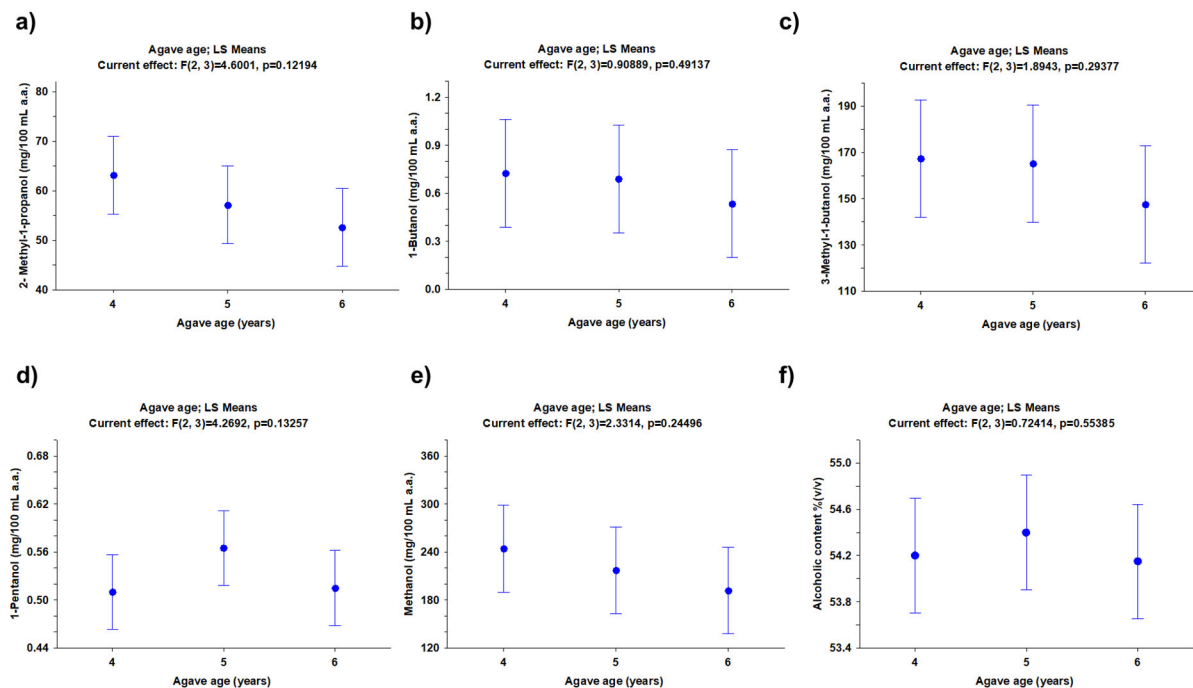

**Figure S3.** Statistical analysis of higher alcohols the final product (tequila 100% agave silver class): (a) 2-Methyl-1-propanol (mg/100 mL a.a.), (b) 1-Butanol (mg/100 mL a.a.), (c) 3-Methyl-1-butanol (mg/100 mL a.a.), (d) 1-Pentanol (mg/100 mL a.a.), (e) Methanol (mg/100 mL a.a.), alcoholic content % (V/V).

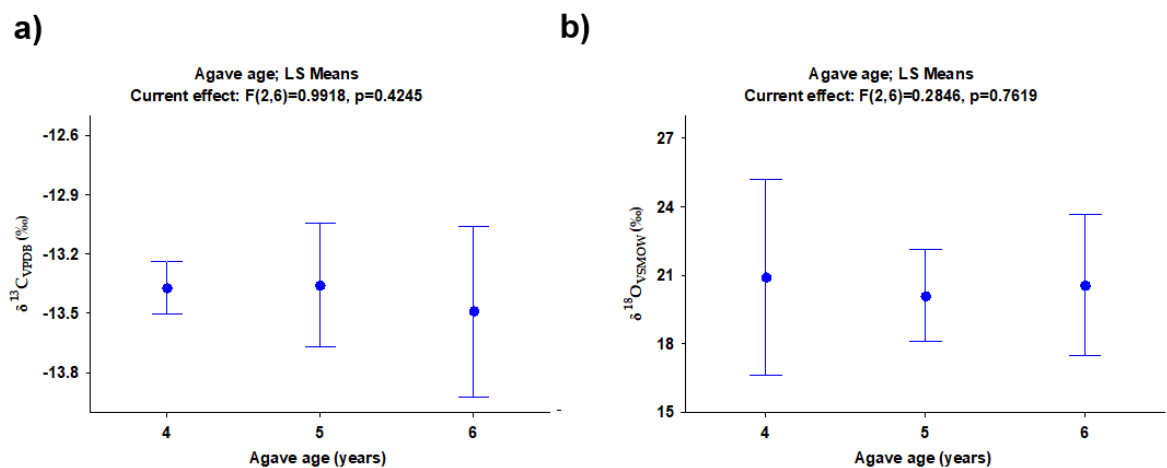

**Figure S4.** Statistical analysis of isotopic ratio of the final product: (a)  $\delta^{13}\text{C}_{\text{VPDB}} (\text{‰})$ , (b)  $\delta^{18}\text{O}_{\text{VSMOW}} (\text{‰})$  (tequila 100% agave silver class).
